# Supplementary material for: Molecular Mechanism Underlying the Action of Zona-pellucida Glycoproteins on Mouse Sperm
Source: Frontiers journal article supplement (doi:10.3389/fcell.2020.572735), 2020-08-31
Supplement: Image_1.pdf [file Image_1.pdf]

### Supplementary Figure 1

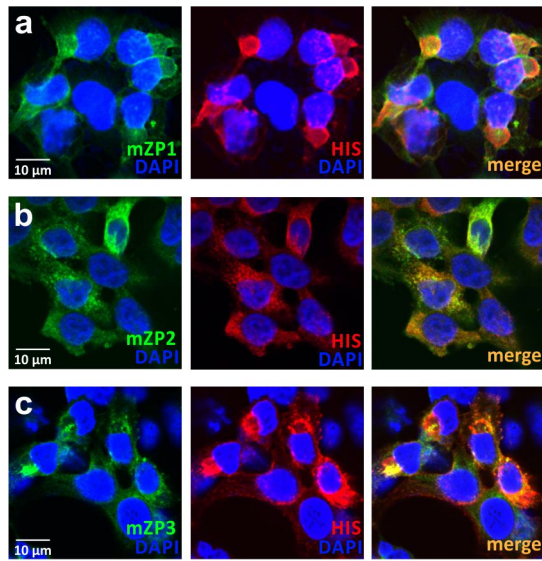

**Supplementary figure 1: Validation of the specificity of anti-ZP antibodies using heterologously expressed protein.** Immunostaining of HEK293T cells heterologously expressing mouse ZP glycoproteins with mZP isoform-specific (green) and His-tag antibodies (red), co-localization shown in yellow, (a) mZP1, (b) mZP2, (c) mZP3; scale bar = 10 μm.
