# Supplementary material for: Molecular Mechanism Underlying the Action of Zona-pellucida Glycoproteins on Mouse Sperm
Source: Frontiers journal article supplement (doi:10.3389/fcell.2020.572735), 2020-08-31
Supplement: Image_2.pdf [file Image_2.pdf]

## Supplementary Figure 2

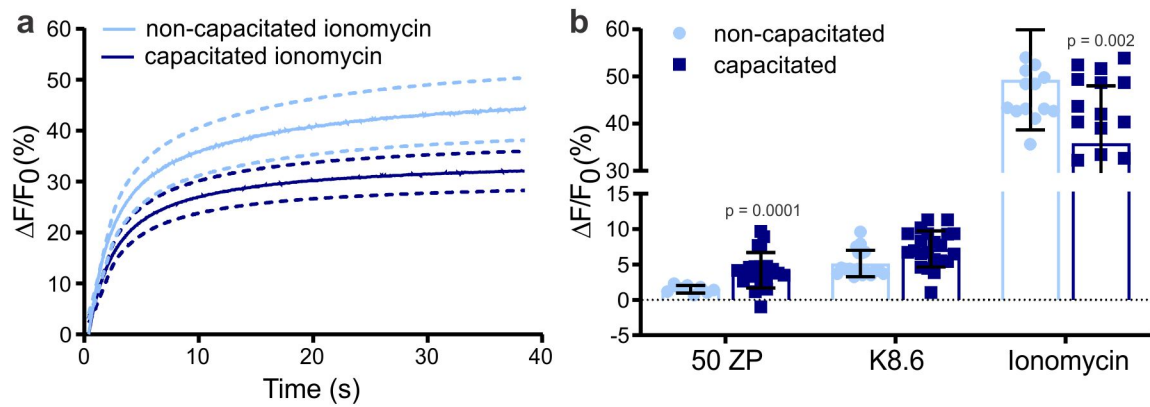

**Supplementary figure 2:  $\text{Ca}^{2+}$  responses in non-capacitated and capacitated mouse sperm.** **(a)**  $\text{Ca}^{2+}$  responses evoked by mixing with 2  $\mu\text{M}$  ionomycin in non-capacitated and capacitated sperm; average  $\pm$  95 % confidence interval ( $n \geq 18$ ) **(b)**  $\text{Ca}^{2+}$  responses evoked by mixing with 1 ZP/ $\mu\text{l}$ , K8.6 or 2  $\mu\text{M}$  ionomycin in non-capacitated and capacitated sperm; individual data points and mean  $\pm$  SD ( $n \geq 18$ ).
