# Supplementary material for: Molecular Mechanism Underlying the Action of Zona-pellucida Glycoproteins on Mouse Sperm
Source: Frontiers journal article supplement (doi:10.3389/fcell.2020.572735), 2020-08-31
Supplement: Image_3.pdf [file Image_3.pdf]

### Supplementary Figure 3

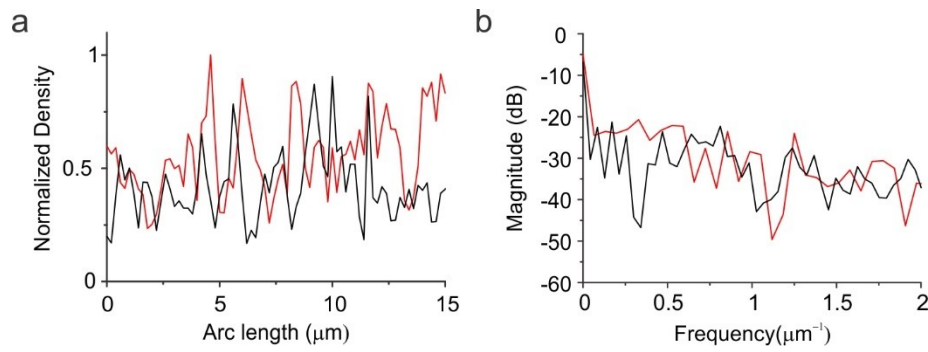

### Supplementary figure 3. Density distribution of CatSper domains along the flagella.

**(a)** Normalized density profile of one CatSper domain along the arc length of wild-type (black) and *Slc9b1*-KO sperm flagella (red). **(b)** Fourier spectrum in dB of the data in **a**, wild-type (black) and *Slc9b1*-KO sperm flagella (red).
